# Supplementary material for: SOX17 Regulates Nestin/p16INK4a Axis to Mitigate Endothelial Senescence in Pulmonary Arterial Hypertension
Source: Research Square preprint supplement (doi:10.21203/rs.3.rs-6999919/v1), 2025-07-29
Supplement: Supplementary file 1 [file 7fb16a8ded7ec1962a4749e2.docx]

**Supplementary Materials**

**SOX17 Regulates Nestin–p16INK4a Axis to Mitigate Endothelial Senescence in Pulmonary Arterial Hypertension**

Ting Wu, Zijing Zhou, Danli Jiang, Tong-you Wei, So Yun Han, John Y-J. Shyy, Gang Li, Ruizheng Shi, Wei Sun

**Corresponding authors:**

Wei Sun, MD

Department of Medicine, University of California, San Diego

9500 Gilman Drive, La Jolla, CA 92093, USA

Phone: +1 858-534-3736

E-mail: WES001@ucsd.edu

Ruizheng Shi, MD

Department of Cardiovascular Medicine, Xiangya Hospital, Central South University, Changsha, China

Phone: +86 137-5508-2530

E-mail: ruizhengshivip@sina.com

Gang Li, PhD

Aging Institute, University of Pittsburgh

100 Technology Drive Pittsburgh, PA 15219, USA

Phone: +1 412-383-4416

E-mail: LIG@pitt.edu

**Supplementary Figure 1. Nestin regulates p14ARF, p15INK4b, p16INK4a, and ANRIL expression in PAECs.**

*Scrambled, Nestin-downregulated PAECs:* A. qPCR analysis of Nestin, p14ARF, p15INK4b, p16INK4a and ANRIL expression; *Scrambled, Nestin-overexpression PAECs:* B. Western blot assay and C. qPCR analysis of Nestin, p14ARF, p15INK4b, p16INK4a and ANRIL expression. n=3 or 6; *: p<0.05; **: p<0.01; ***: p<0.001; ****: p<0.0001.

**
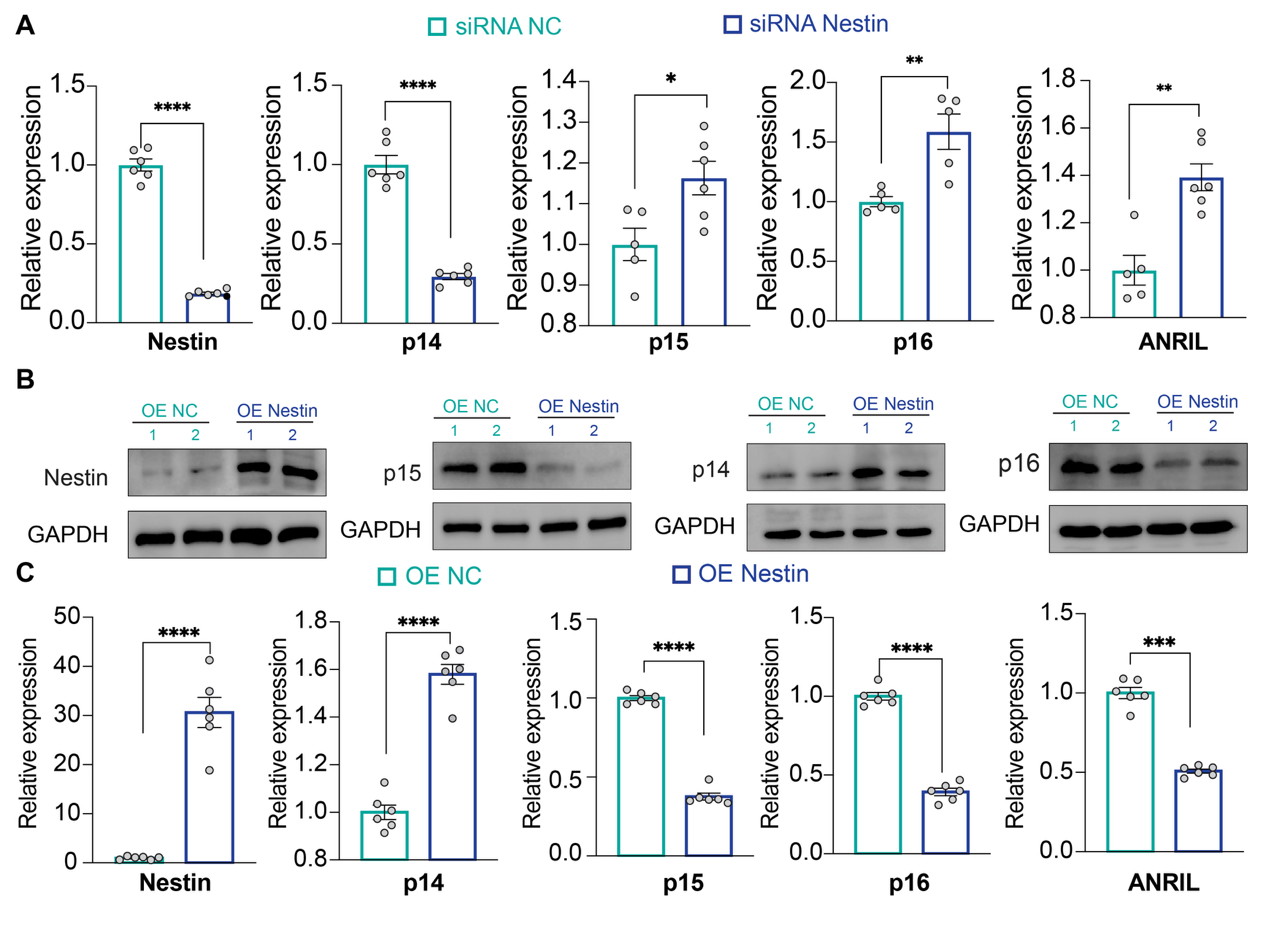
**

**Supplementary Figure 2. Cell cycle analysis in scrambled, Nestin- and/or p16INK4a knockdown PAECs.** n=4; *: p<0.05; ns: not significance.

**
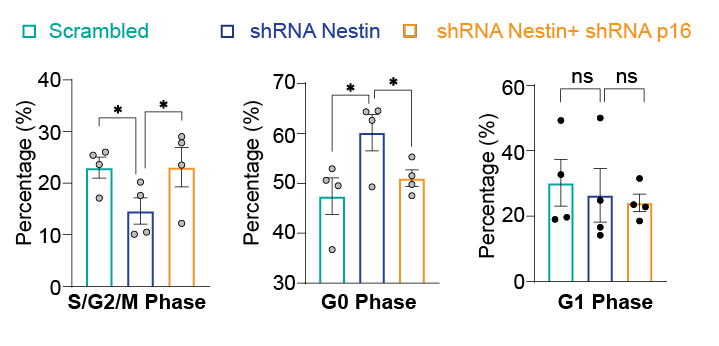
**

**Supplementary Figure 3. ChIP experiment showing the lack of SOX17 binding to the candidate sequences within the Nestin promoter.**

**
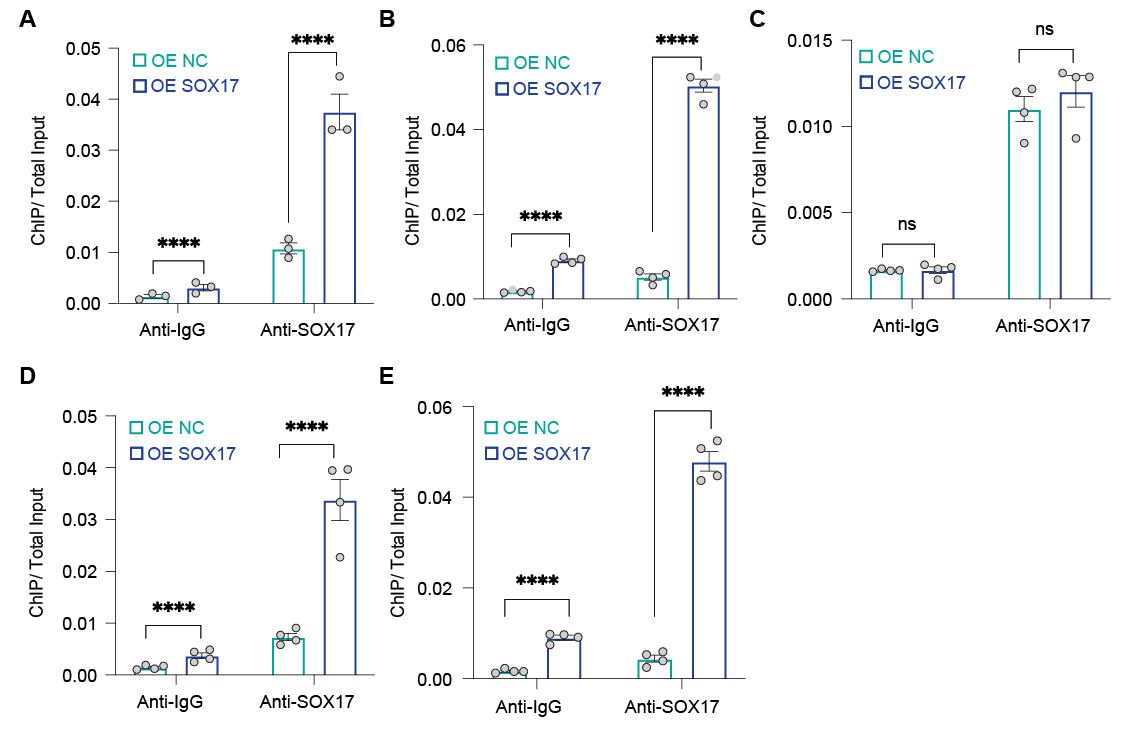
**A. S1 sequence; B. S2 sequence; C. S3 sequence; D. S5 sequence; E. S6 sequence.

**Supplementary Figure 4. SOX17 inhibits cellular senescence by inducing Nestin expression.**

*Scrambled, SOX17-downregulated and/or Nestin-overexpressed PAECs:* qPCR analysis of A. SOX17, B. Nestin and C. p16INK4a expression; *Scrambled, SOX17-overexpression and/or Nestin-downregulated PAECs:* qPCR analysis of D. SOX17, E. Nestin and F. p16INK4a expression. n=6; *: p<0.05; **: p<0.01; ***: p<0.001; ****: p<0.0001; ns: not significance.

**
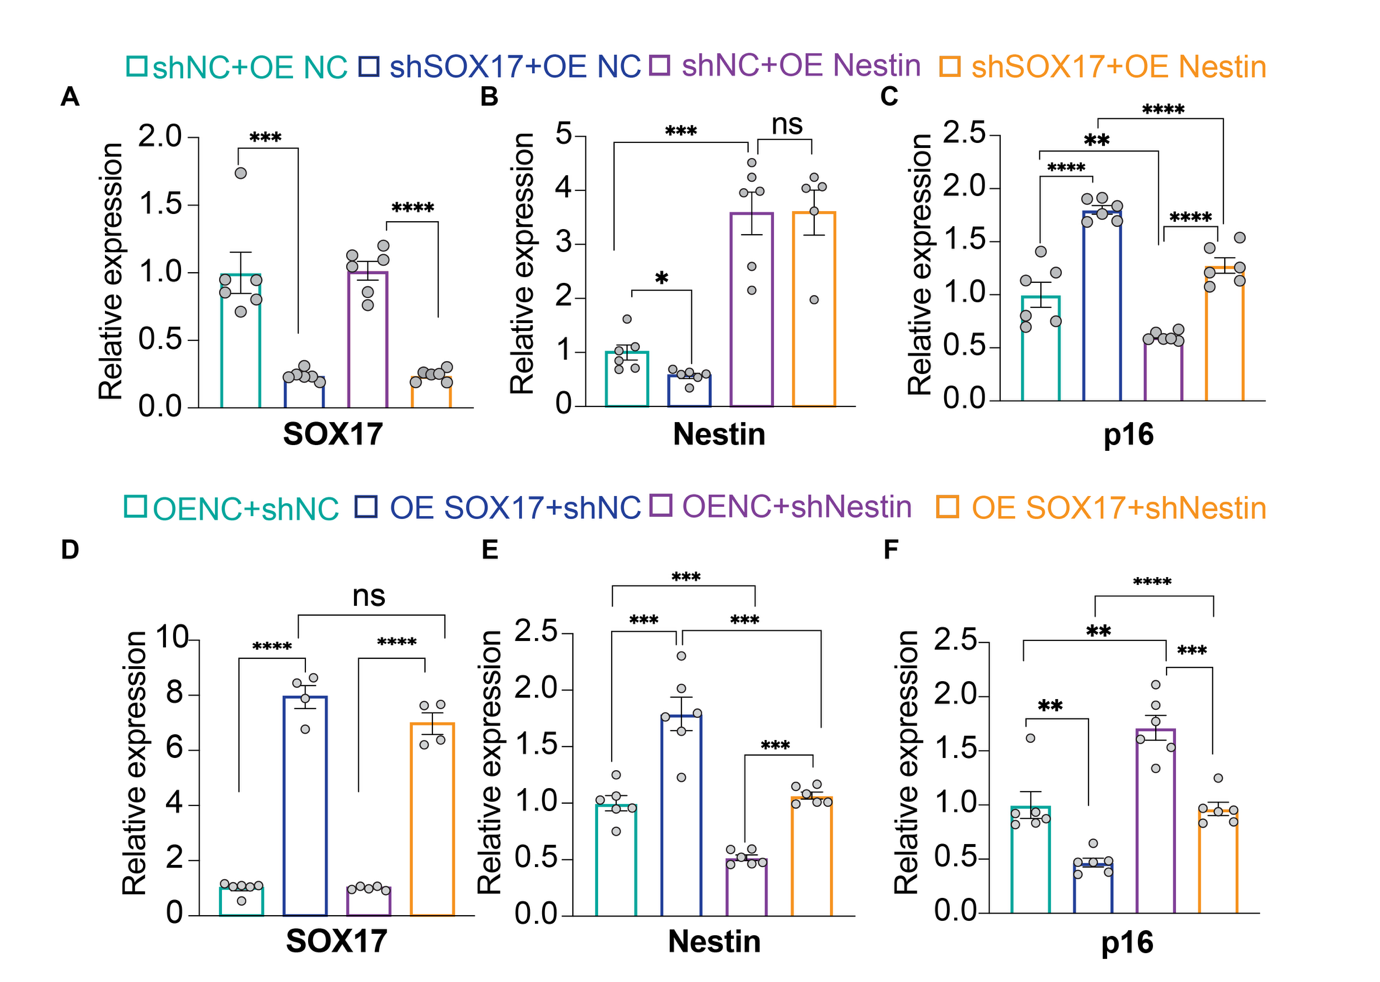
**

**Supplementary Figure 5. SOX17/Nestin is responsible for IL-1β-induced endothelial dysfunction.** *Control PAECs and PAECs that were treated with IL-1β or treated with IL-1β and overexpressed SOX17 and/or downregulated Nestin:* Tube formation assay demonstrating tube forming capacity of PAECs. n=3; *: p<0.05; **: p<0.01.

**
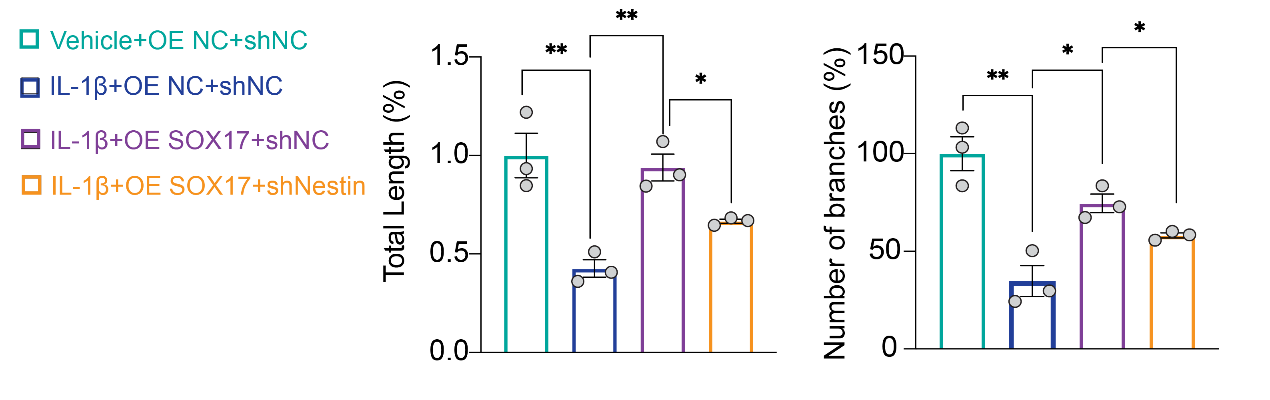
**

**Supplementary Figure 6. SOX17/Nestin regulates endothelial senescence in PAH pathological stimuli.**

*Pulmonary ECs isolated from mice exposed to normoxia or hypoxia and treated with overexpressed SOX17 and/or downregulated Nestin:* A. Western blot assay and B. qPCR analysis of SOX17, Nestin and p16INK4a expression; C. SA-β-gal, D. γ-H2AX staining and E. expression of SASP genes. n=3 or 6; *: p<0.05; **: p<0.01; ***: p<0.001; ****: p<0.0001; ns: not significance; scale bar: 100μm.

**
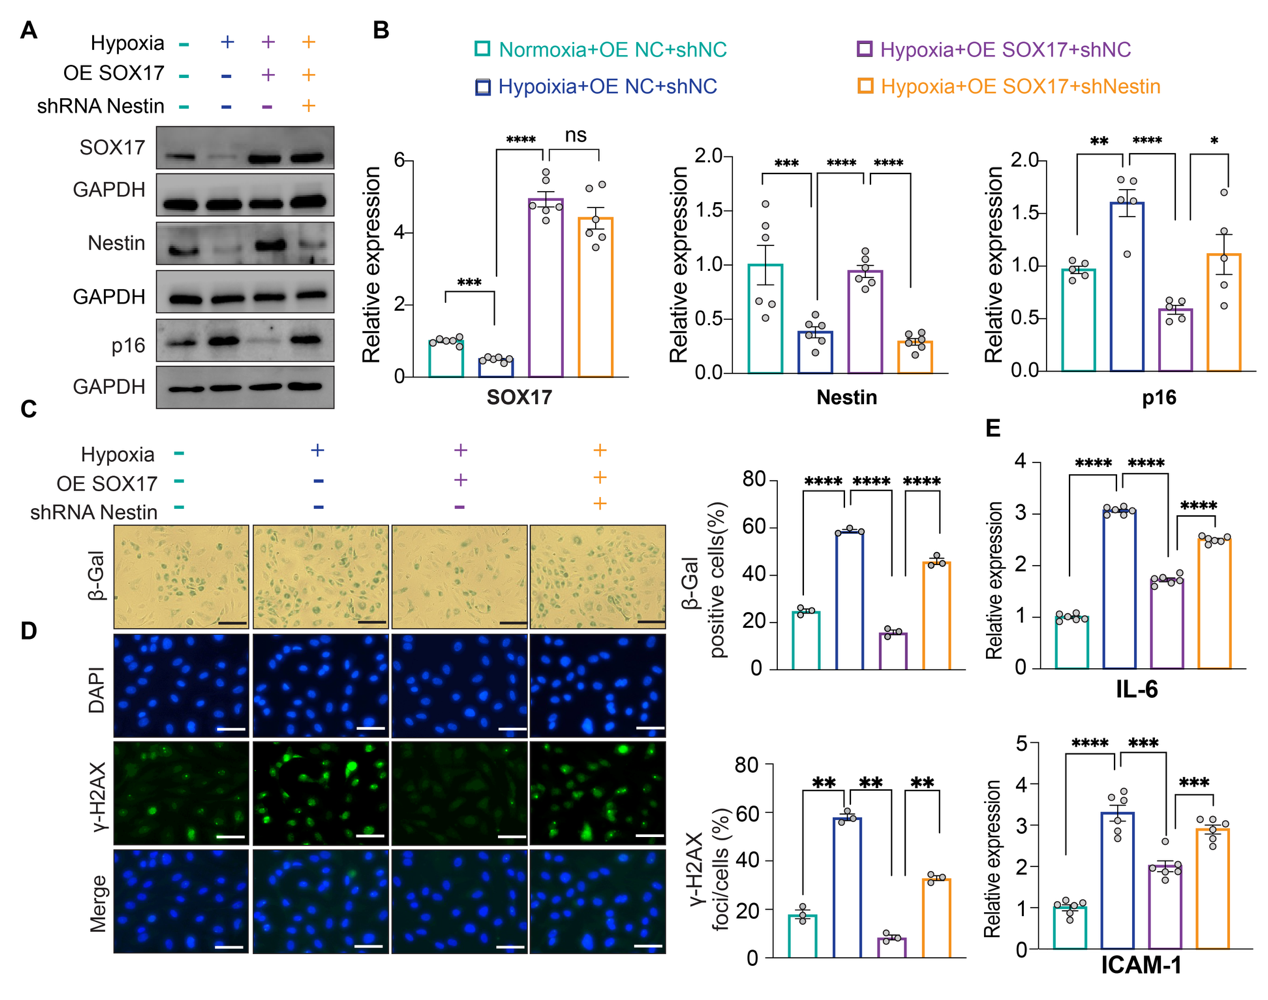
**

**Supplementary Table 1.** Primers used in this paper

| **Usage** | **Primer name** | **Sequence** |
| --- | --- | --- |
| qRT-PCR | IL6-F | GCAGAAAACAACCTGAACCTT |
| IL6-R | ACCTCAAACTCCAAAAGACCA |
| ICAM1-F | AGCGGCTGACGTGTGCAGTAAT |
| ICAM1-R | TCTGAGACCTCTGGCTTCGTCA |
| GAPDH-F | CGACCACTTTGTCAAGCTCA |
| GAPDH-R | AGGGGTCTACATGGCAACTG |
| Nestin-F | CTGCTACCCTTGAGACACCTG |
| Nestin-R | GGGCTCTGATCTCTGCATCTAC |
| SOX17-F | GCCAAGGGCGAGTCCCGTA |
| SOX17-R | GCATCTTGCTCAACTCGGCGTTGTGCA |
| shRNA knockdown | Nestin shRNA | GCAGACATCATTGGTGTTAAT |
| SOX17 shRNA | GCGGTATATTACTGCAACTAT |
| DNA pulldown Western blot | S1606 | Biotin-GGAAATGTGATCTTAAAATTATAGGACCTCAAATT |
| WT | Biotin-TTCTTGTTTTCCAGGCAGCGTCTC |
| Mut | Biotin-TTCTTGTTCGTACTATAGCGTCTC |
| Luciferase reporter assay | S1606 | GGAAATGTGATCTTAAAATTATAGGACCTCAAATT |
| Binding sequence | TTCTTGTTTTCCAGGCAGCGTCTC |
| Mutated | TTCTTGTTCGTACTATAGCGTCTC |
| ChIP | S1606/Nestin-F | AGTTGCTCATTGTCCATGC |
| S1606/Nestin-R | TGTGCTTGGCACCTAGAGGATTTC |
| SOX17/Nestin-F | AACCTGGTCGCTCCCTTTTC |
| SOX17/Nestin-R | AAGCTAGAGAGACGCTGCC |
| FREP-MS | BioS1606-F | GCTGTGTTCCGTTGTCCGTGCTGAATGGATCCGGATCCGGAAATGTGATCTTAAAATTATAGGACCTCAAATTGAATTCGAATTC |
| S1606-R | GAATTCGAATTCAATTTGAGGTCCTATAATTTTAAGATCACATTTCCGGATCCGGATCCA |
| BioNegative-F | GTCTGTGTTCCGTTGTCCGTGCTGAATGGATCCGGATCCACCCGGAGGAACCACGGGGAAAGTGCGCTTCTGAGGAATTCGAATTC |
| Negative-R | GAATTCGAATTCCTCAGAAGCGCACTTTCCCCGTGGTTCCTCCGGGTGGATCCGGATCCA |

**Supplementary Table 2.** Antibodies used in this paper

| **Antibody** | **Manufacturer** | **Cat#** | **Usage** |
| --- | --- | --- | --- |
| SOX17 | Proteintech | 24903-1-AP | WB |
| SOX17 | R&D Systems | AF1924-SP | ChIP |
| SOX17 | Abcam | ab224637 | IF |
| Nestin | Proteintech | 19483-1-AP | WB/IF |
| Nestin | Santa Cruz | sc-33677 | ChIP |
| Rabbit IgG | Cell signaling | 2729S | ChIP |
| *p14ARF* | Invitrogen | MA5-14260 | WB |
| *p15INK4b* | Invitrogen | PA5-49749 | WB |
| *p16INK4a* | Proteintech | 10883-1-AP | WB |
| GAPDH | Proteintech | 60004-1-Ig | WB |
| PCNA | Proteintech | 60097-1-Ig | WB |
| γ-H2AX | Santa Cruz | sc-517348 | IF |
| Alexa Fluor 488-conjugated antibodies | Invitrogen | A28175 | IF |

**Supplementary Table 3.** Patient information (5 PAH and 5 controls) for Figure. 3C-E

| **Patients** | **Age** | **Gender** | **Diagnosis** | **mPAP**  **(mmHg)** | **Clinical description** | **Tissue** |
| --- | --- | --- | --- | --- | --- | --- |
| 1 | 34 | Female | Idiopathic PAH | 50 | Cardiopulmonary arrest | Lung |
| 2 | 64 | Female | Idiopathic PAH | 55 | Cardiopulmonary arrest | Lung |
| 3 | 68 | Female | Scleroderma PAH | 44 | Bilateral lung transplant | Lung |
| 4 | 16 | Male | Idiopathic PAH | 62 | Bilateral lung transplant | Lung |
| 5 | 19 | Male | Idiopathic PAH | 48 | Lung resection | Lung |
| 6 | 36 | Female | Non-PAH | / | Bilateral lung transplant | Lung |
| 7 | 56 | Male | Non-PAH | / | Bilateral lung transplant | Lung |
| 8 | 55 | Male | Non-PAH | / | Bilateral lung transplant | Lung |
| 9 | 23 | Female | Non-PAH | / | Bilateral lung transplant | Lung |
| 10 | 18 | Male | Non-PAH | / | Bilateral lung transplant | Lung |
